# Supplementary material for: Prospects for 207Pb solid-state NMR studies of lead tetrel bonds
Source: Royal Society of Chemistry journal article supplement (doi:10.1039/c7fd00087a), 2017-01-01
Supplement: c7fd00087a1.pdf [file c7fd00087a1.pdf]

## ELECTRONIC SUPPLEMENTARY INFORMATION

### Prospects for $^{207}\text{Pb}$ Solid-State NMR Studies of Lead Tetrel Bonds

Scott A. Southern,<sup>‡</sup> Dylan Errulat, Jamie M. Frost,<sup>£</sup> Bulat Gabidullin, and David L. Bryce\*

Department of Chemistry and Biomolecular Sciences &  
Centre for Catalysis Research and Innovation  
University of Ottawa  
10 Marie Curie Private  
Ottawa, Ontario K1N 6N5  
Canada

<sup>‡</sup> Presenting author.

<sup>£</sup> Current address: University of Glasgow, School of Chemistry, Glasgow, UK G12 8QQ

\*Author to whom correspondence is to be addressed

Tel: +1-613-562-5800 ext.2018; fax: +1-613-562-5170

Email: [dbryce@uottawa.ca](mailto:dbryce@uottawa.ca)

**Table S1.** Minimum and maximum computed electrostatic potential values (a.u.)

| compound | minimum electrostatic potential | maximum electrostatic potential |
|----------|---------------------------------|---------------------------------|
| <b>1</b> | -0.0814                         | 0.130                           |
| <b>2</b> | -0.0746                         | 0.129                           |
| <b>3</b> | -0.0732                         | 0.117                           |
| <b>4</b> | -0.0555                         | 0.120                           |
| <b>5</b> | -0.0821                         | 0.122                           |

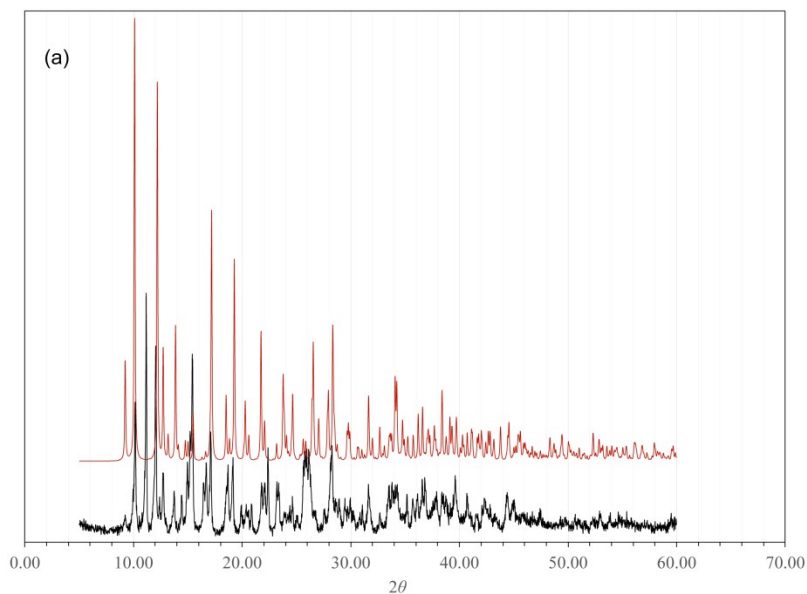

**Figure S1.** Powder X-Ray diffractogram for **1**. The calculated pattern (red) obtained from Mercury is offset above the experimental data (black). The origins of additional reflections are addressed in the main text.

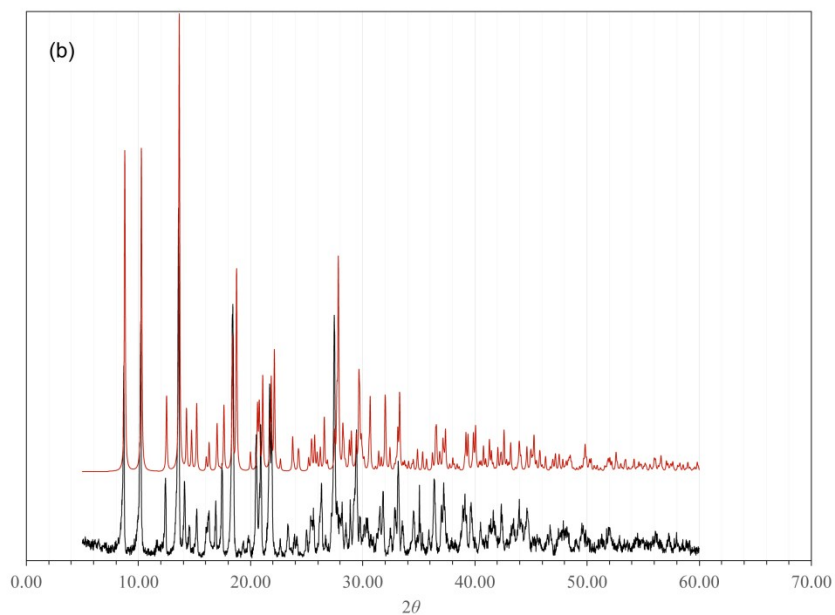

**Figure S2.** Powder X-Ray diffractogram for **3**. The calculated pattern (red) obtained from Mercury is offset above the experimental data (black). The presence of additional peaks of low intensity is attributed to residual lead thiocyanate (see main text).

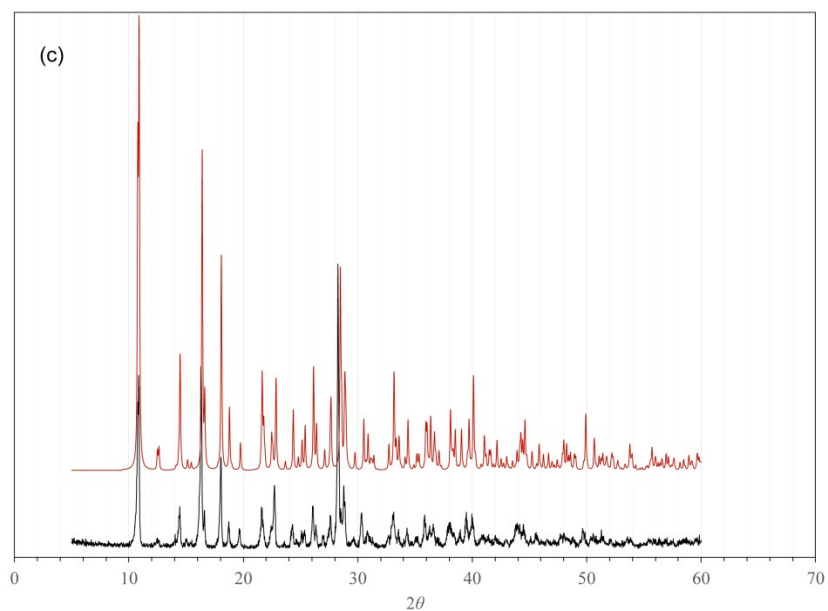

**Figure S3.** Powder X-Ray diffractogram for **2**. The calculated pattern (red) obtained from Mercury is offset above the experimental data (black).

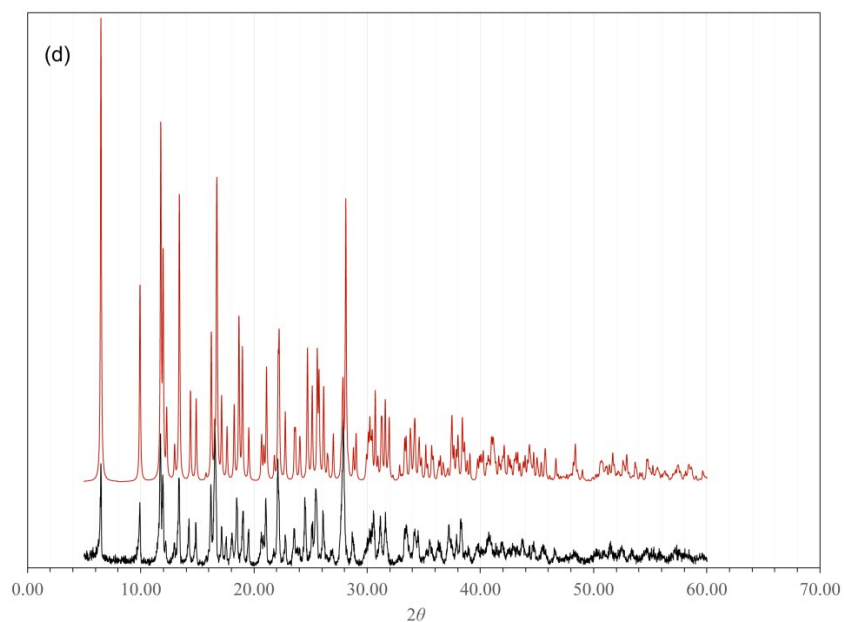

**Figure S4.** Powder X-Ray diffractogram for **4**. The calculated pattern (red) obtained from Mercury is offset above the experimental data (black).

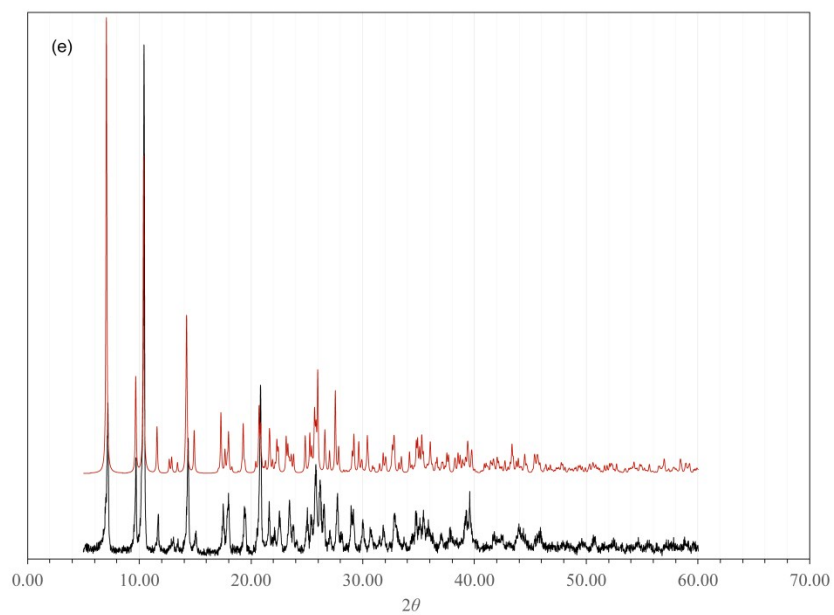

**Figure S5.** Powder X-Ray diffractogram for **5**. The calculated pattern (red) obtained from Mercury is offset above the experimental data (black).
